# Supplementary material for: Islet ChREBP-β is increased in diabetes and controls ChREBP-α and glucose-induced gene expression via a negative feedback loop
Source: PubMed Central journal article supplement — Mol Metab. 2016 Sep 30;5(12):1208–15. doi: 10.1016/j.molmet.2016.09.010 (PMC5123192; doi:10.1016/j.molmet.2016.09.010), 2016-09-30
Supplement: mmc1.pdf [file mmc1.pdf]

**Supplementary Table S1. Primers used in the study**

| <b>Description</b>                                                       | <b>Sequences (5'-3')</b>        |
|--------------------------------------------------------------------------|---------------------------------|
| <b>Rat</b>                                                               |                                 |
| ChREBP- $\alpha$ 5' qRT-PCR primer                                       | CGACACTCACCCGCCTCTTC            |
| ChREBP- $\alpha$ 3' qRT-PCR primer                                       | TTGTTTCAGCCGAATCTTGTC           |
| ChREBP- $\beta$ 5' qRT-PCR primer                                        | TCTGCAGATCGCGCGGAG              |
| ChREBP- $\beta$ 3' qRT-PCR primer                                        | CTTGTCCCGGCATAGCAAC             |
| TXNIP 5' qRT-PCR primer                                                  | CGAGTCAAAGCCGTCAGGAT            |
| TXNIP 3' qRT-PCR primer                                                  | TTCATAGCGCAAGTAGTCCAAGGT        |
| L-PK 5' qRT-PCR primer                                                   | CTTTGATCCAGGCTCTGCAGAC          |
| L-PK 3' qRT-PCR primer                                                   | TGAGTCCTGGTTAAAGTATAACC         |
| GPDH 5' qRT-PCR primer                                                   | ATCAACACGCAACACGAGAA            |
| GPDH 3' qRT-PCR primer                                                   | CCCTTGAGCTGGTCACAGAT            |
| ACC 5' qRT-PCR primer                                                    | TCGAAGAGCTTATATCGCCTATGA        |
| ACC 3' qRT-PCR primer                                                    | GGGCAGCATGAACTGAAATTC           |
| TXNIP 5' ChIP primer                                                     | AAGGACCAAGTAGCCAATGGG           |
| TXNIP 3' ChIP primer                                                     | GTGCTGGCCCGGAGG                 |
| GADPH 5' ChIP control primer                                             | ACCATGCTTCACTGACATTCTGA         |
| GADPH 3' ChIP control primer                                             | GGTCTGCCTCCCTGCTAACC            |
| <b>Human</b>                                                             |                                 |
| ChREBP- $\alpha$ 5' qRT-PCR primer                                       | AGTGCTTGAGCCTGGCCTAC            |
| ChREBP- $\alpha$ 3' qRT-PCR primer                                       | TTGTTTCAGGCGGATCTTGTC           |
| ChREBP- $\beta$ 5' qRT-PCR primer                                        | AGCGGATTCCAGGTGAGG              |
| ChREBP- $\beta$ 3' qRT-PCR primer                                        | TTGTTTCAGGCGGATCTTGTC           |
| <b>Mouse</b>                                                             |                                 |
| ChREBP- $\alpha$ 5' qRT-PCR primer                                       | CGACACTCACCCACCTCTTC            |
| ChREBP- $\alpha$ 3' qRT-PCR primer                                       | TTGTTTCAGCCGGATCTTGTC           |
| ChREBP- $\beta$ 5' qRT-PCR primer                                        | TCTGCAGATCGCGTGGAG              |
| ChREBP- $\beta$ 3' qRT-PCR primer                                        | CTTGTCCCGGCATAGCAAC             |
| Mouse ChREBP- $\alpha$ promoter 5' cloning primer                        | CGACGCGTCAATCTCTGTGGATCGTGAACC  |
| Mouse ChREBP- $\alpha$ promoter 3' cloning primer                        | CCGCTCGAGGGCCACTATTGTCGCCAAC    |
| Mouse ChREBP- $\beta$ promoter 5' cloning primer                         | CGACGCGTAGGGTGAGTTCAGGACAGC     |
| Mouse ChREBP- $\beta$ promoter 3' cloning primer                         | CCGCTCGAGTCCTCTGCGAGGCATCTATG   |
| Mouse ChREBP- $\beta$ into pcDNA3.1/V5-His TOPO vector 5' cloning primer | CCCAAGCTTATGCGCGAATACCACAAGTG   |
| Mouse ChREBP- $\beta$ into pcDNA3.1/V5-His TOPO vector 3' cloning primer | CCGCTCGAGTTATAATGGTCTCCCCAGGGTG |

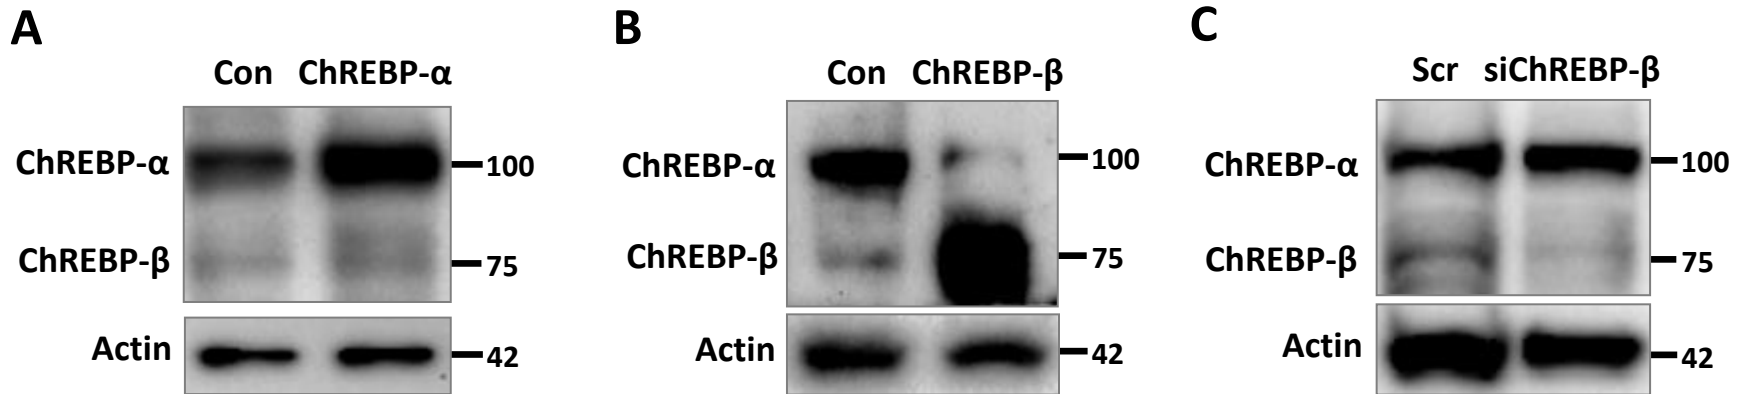

**Supplemental Figure S1. Detection of ChREBP-β by immunoblotting.** ChREBP-β protein expression in INS-1 beta cells with (A) ChREBP-α overexpression, (B) ChREBP-β overexpression and (C) ChREBP-β knockdown. Representative images of at least 3 independent experiments are shown.

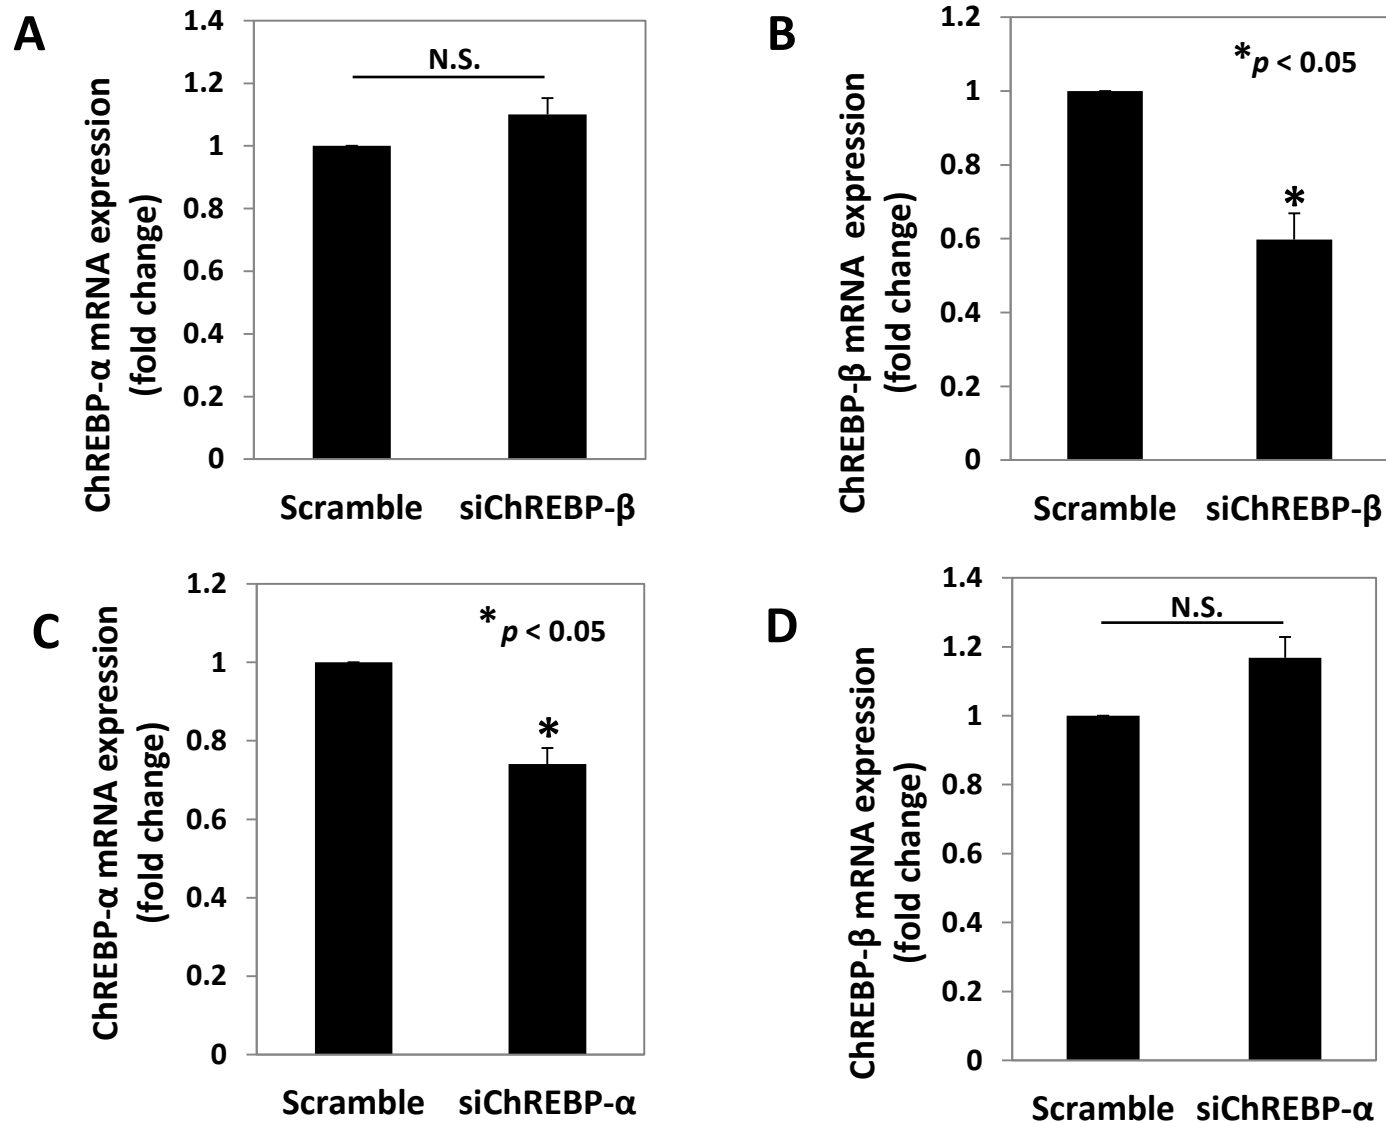

**Supplemental Figure S2. Specificity of ChREBP- $\beta$  and ChREBP- $\alpha$  knockdown.** INS-1 were maintained in regular growth medium and cells were transfected with specific siRNAs targeting ChREBP- $\beta$  (A-B) or ChREBP- $\alpha$  (C-D) or scrambled control and after 48h ChREBP- $\alpha$  (A, C) and ChREBP- $\beta$  expression (B, D) was assessed by qRT-PCR. Bars represent means  $\pm$ SEM of at least 3 independent experiments.

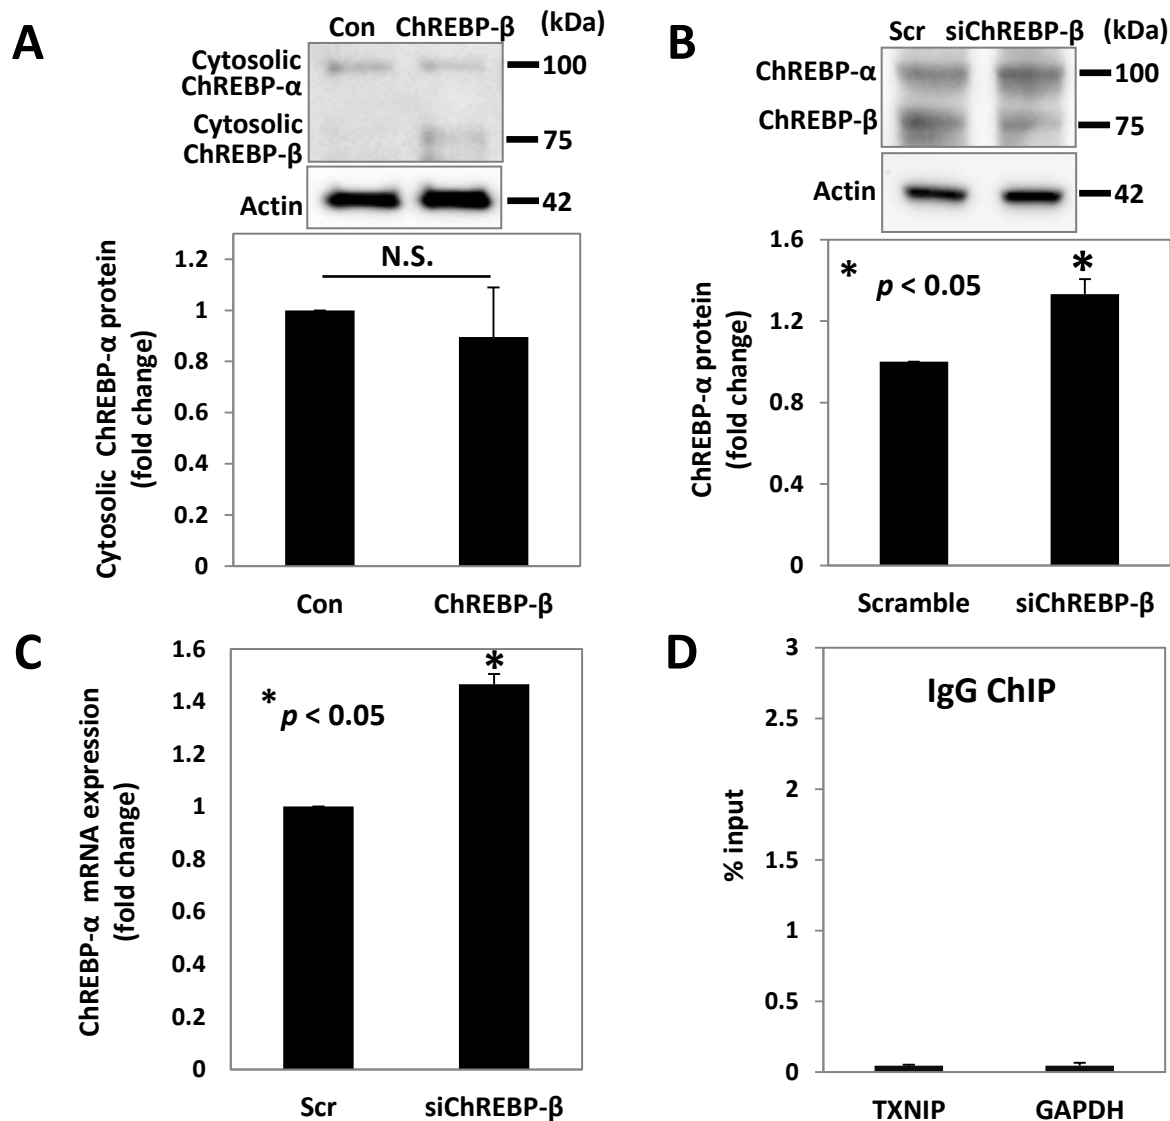

**Supplemental Figure S3.** (A) Cytosolic ChREBP- $\alpha$  was assessed by immunoblotting after cell fractionation of INS-1 cells with or without ChREBP- $\beta$  overexpression. (B) Total ChREBP- $\alpha$  was assessed by immunoblotting in INS-1 cells with or without ChREBP- $\beta$  knockdown (siChREBP- $\beta$ ). (C) INS-1 cells were transfected with siChREBP- $\beta$  and after 48h at 25mM glucose ChREBP- $\alpha$  mRNA expression was assessed by qRT-PCR. (D) ChIP assays were performed in INS-1 cells using normal goat IgG. The GAPDH coding region and TXNIP ChoRE region were amplified by qRT-PCR. Bars represent means  $\pm$ SEM of 3 independent experiments and representative immunoblots are shown.
